# Supplementary material for: Genetic Diversity of Human Respiratory Syncytial Virus during COVID-19 Pandemic in Yaoundé, Cameroon, 2020–2021
Source: MDPI journal article supplement (doi:10.3390/microorganisms12050952), 2024-05-08
Supplement: s1 [file s1]

**S1 table. Reference sequences used to construct Fig1**

| Number | Genbank number | Year | Genotype | Origin      |
|--------|----------------|------|----------|-------------|
| 1      | KU316165       | 1987 | GA1      | USA         |
| 2      | Z33427         | 1990 | GA1      | Uruguay     |
| 3      | KJ723483       | 1984 | GA2.1    | USA         |
| 4      | MG642070       | 1986 | GA2.1    | USA         |
| 5      | JF920062       | 1998 | GA2.2    | USA         |
| 6      | JX069801       | 1998 | GA2.2    | USA         |
| 7      | KP119748       | 2012 | GA2.3.0  | HongKong    |
| 8      | KU950573       | 2006 | GA2.3.0  | USA         |
| 9      | EU025215       | 2005 | GA2.3.1  | Italy       |
| 10     | KJ627305       | 2007 | GA2.3.1  | Peru        |
| 11     | KT765718       | 2006 | GA2.3.2a | Kenya       |
| 12     | KT765726       | 2005 | GA2.3.2a | Kenya       |
| 13     | KJ627284       | 2010 | GA2.3.2b | Peru        |
| 14     | KJ627336       | 2008 | GA2.3.2b | Peru        |
| 15     | KJ627349       | 2009 | GA2.3.3  | Peru        |
| 16     | KP317953       | 2012 | GA2.3.3  | Kenya       |
| 17     | KJ672482       | 2012 | GA2.3.4  | USA         |
| 18     | KU950667       | 2012 | GA2.3.4  | USA         |
| 19     | JN257693       | 2010 | GA2.3.5  | Canada      |
| 20     | KJ672470       | 2012 | GA2.3.5  | USA         |
| 21     | KJ672467       | 2013 | GA2.3.5  | USA         |
| 22     | KU950531       | 2013 | GA2.3.5  | USA         |
| 23     | KU950540       | 2013 | GA2.3.5  | USA         |
| 24     | KU950550       | 2012 | GA2.3.5  | USA         |
| 25     | KX765917       | 2014 | GA2.3.5  | New Zealand |
| 26     | KX765932       | 2015 | GA2.3.5  | New Zealand |
| 27     | KY654514       | 2013 | GA2.3.5  | Philippines |
| 28     | KX894807       | 2013 | GA2.3.5  | USA         |
| 29     | KY654518       | 2013 | GA2.3.5  | Philippines |
| 30     | KY883567       | 2015 | GA2.3.5  | Argentina   |
| 31     | KT326808       | 2015 | GA2.3.6a | Spain       |
| 32     | KU350793       | 2012 | GA2.3.6a | Argentina   |
| 33     | KX453353       | 2013 | GA2.3.6b | Kenya       |

|    |          |      |          |           |
|----|----------|------|----------|-----------|
| 34 | KX453385 | 2014 | GA2.3.6b | Kenya     |
| 35 | HQ731716 | 1981 | GA2      | England   |
| 36 | MG642063 | 1982 | GA2      | USA       |
| 37 | DQ985132 | 1997 | GA3.0.0  | Belgium   |
| 38 | KP258715 | 1988 | GA3.0.0  | USA       |
| 39 | KP258699 | 1985 | GA3.0.1  | USA       |
| 40 | MG642031 | 1982 | GA3.0.1  | USA       |
| 41 | KJ723465 | 1992 | GA3.0.2  | USA       |
| 42 | KP258701 | 1994 | GA3.0.2  | USA       |
| 43 | JX069802 | 1998 | GA3.0.3a | USA       |
| 44 | KM360090 | 2001 | GA3.0.3a | USA       |
| 45 | AY910792 | 2000 | GA3.0.3b | Argentina |
| 46 | JX513302 | 2002 | GA3.0.3b | Brazil    |
| 47 | KF826854 | 2009 | GA3.0.4a | Italy     |
| 48 | DQ985748 | 2006 | GA3.0.4a | Turkey    |
| 49 | KF826850 | 2008 | GA3.0.4b | USA       |
| 50 | KF973333 | 2002 | GA3.0.4b | USA       |
| 51 | KC297367 | 2012 | GA3.0.5b | China     |
| 52 | KF826832 | 2009 | GA3.0.5b | Italy     |
