# Supplementary material for: Genetic Diversity of Human Respiratory Syncytial Virus during COVID-19 Pandemic in Yaoundé, Cameroon, 2020–2021
Source: MDPI journal article supplement (doi:10.3390/microorganisms12050952), 2024-05-08
Supplement: s1 [file s1]

**S2 table. Reference sequences used to construct Fig2**

| Number | Genbank number | Year | Genotype | Origin       |
|--------|----------------|------|----------|--------------|
| 1      | AY353550       | 1977 | GB1      | USA          |
| 2      | KP258736       | 1982 | GB1      | USA          |
| 3      | HQ731708       | 1985 | GB2      | England      |
| 4      | M73540         | 1980 | GB2      | USA          |
| 5      | AY333361       | 1990 | GB3      | Uruguay      |
| 6      | JX198166       | 1993 | GB3      | USA          |
| 7      | AF193331       | 1991 | GB4      | South Korea  |
| 8      | JX198160       | 1993 | GB4      | USA          |
| 9      | KF826853       | 2008 | GB5.0.0  | Germany      |
| 10     | KP317923       | 2012 | GB5.0.0  | Kenya        |
| 11     | AY751111       | 2003 | GB5.0.1  | Belgium      |
| 12     | KF826829       | 2005 | GB5.0.1  | Mexico       |
| 13     | HQ731688       | 2006 | GB5.0.2  | Scotland     |
| 14     | KC297492       | 2009 | GB5.0.2  | China        |
| 15     | JN032117       | 2006 | GB5.0.3  | USA          |
| 16     | KF246627       | 2010 | GB5.0.3  | India        |
| 17     | KM402687       | 2013 | GB5.0.4a | Spain        |
| 18     | KY249677       | 2012 | GB5.0.4a | England      |
| 19     | JX576746       | 2008 | GB5.0.4b | Netherlands  |
| 20     | KJ627285       | 2011 | GB5.0.4b | Peru         |
| 21     | KJ939928       | 2010 | GB5.0.4c | Vietnam      |
| 23     | KP862515       | 2012 | GB5.0.4c | Kenya        |
| 24     | KX765906       | 2015 | GB5.0.5a | New Zealand  |
| 25     | KY249683       | 2016 | GB5.0.5a | England      |
| 26     | MG773268       | 2016 | GB5.0.5a | Argentina    |
| 27     | MG839547       | 2016 | GB5.0.5a | Argentina    |
| 28     | KX775765       | 2014 | GB5.0.5c | Kenya        |
| 28     | KX775767       | 2013 | GB5.0.5c | Kenya        |
| 29     | JF704213       | 1998 | GB6      | South Africa |
| 30     | KP862078       | 2003 | GB6      | Kenya        |
| 31     | KP862095       | 2004 | GB6      | Kenya        |
